# Supplementary material for: Toxicity Mechanism of Low Doses of NaGdF4:Yb3+,Er3+ Upconverting Nanoparticles in Activated Macrophage Cell Lines
Source: MDPI journal article supplement (doi:10.3390/biom9010014), 2019-01-03
Supplement: s1 [file s1]

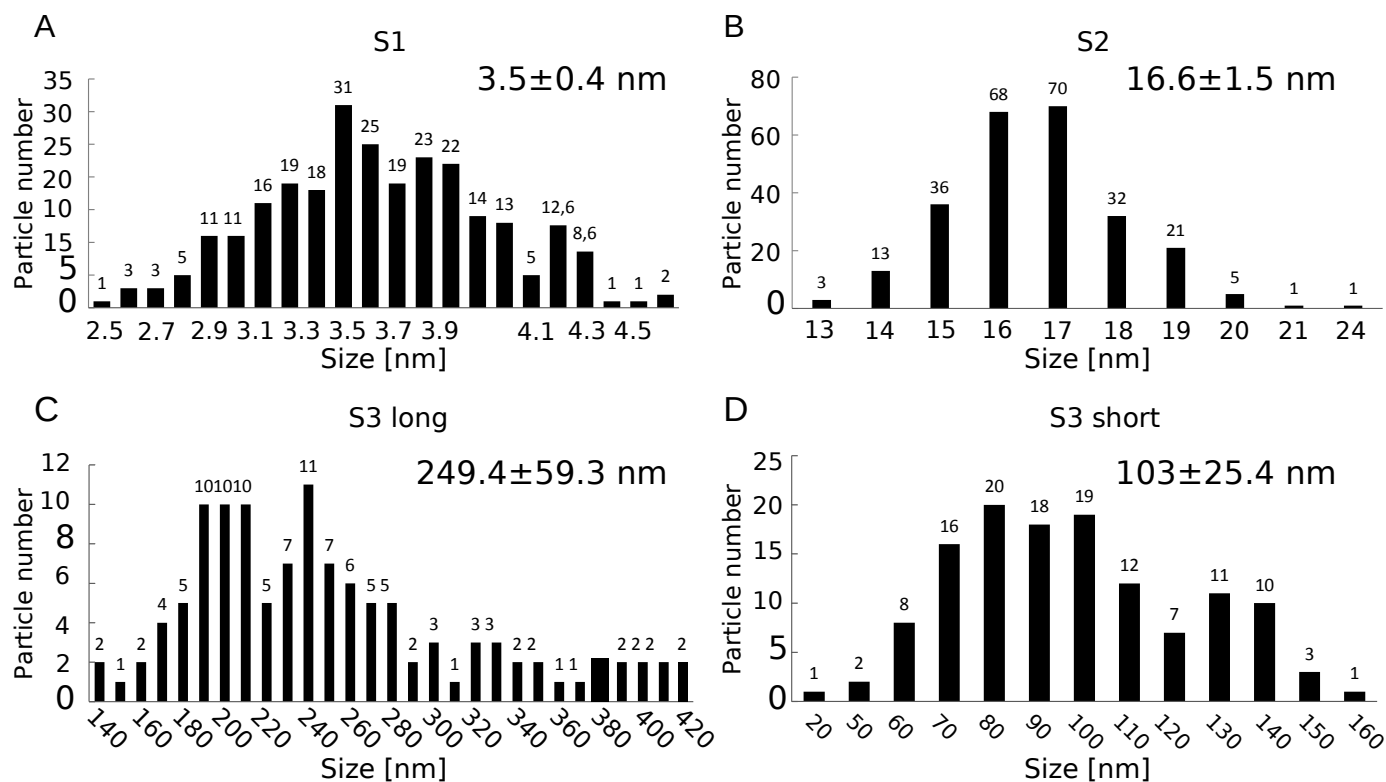

Figure S1. Size distribution of NaGdF<sub>4</sub> based NPs measured by TEM. A) S1 NPs B) S2 NPs C) The long side of S3 NPs D) The short side of S3 NPs. In the upper right corner the averages of diameter with SD are shown.

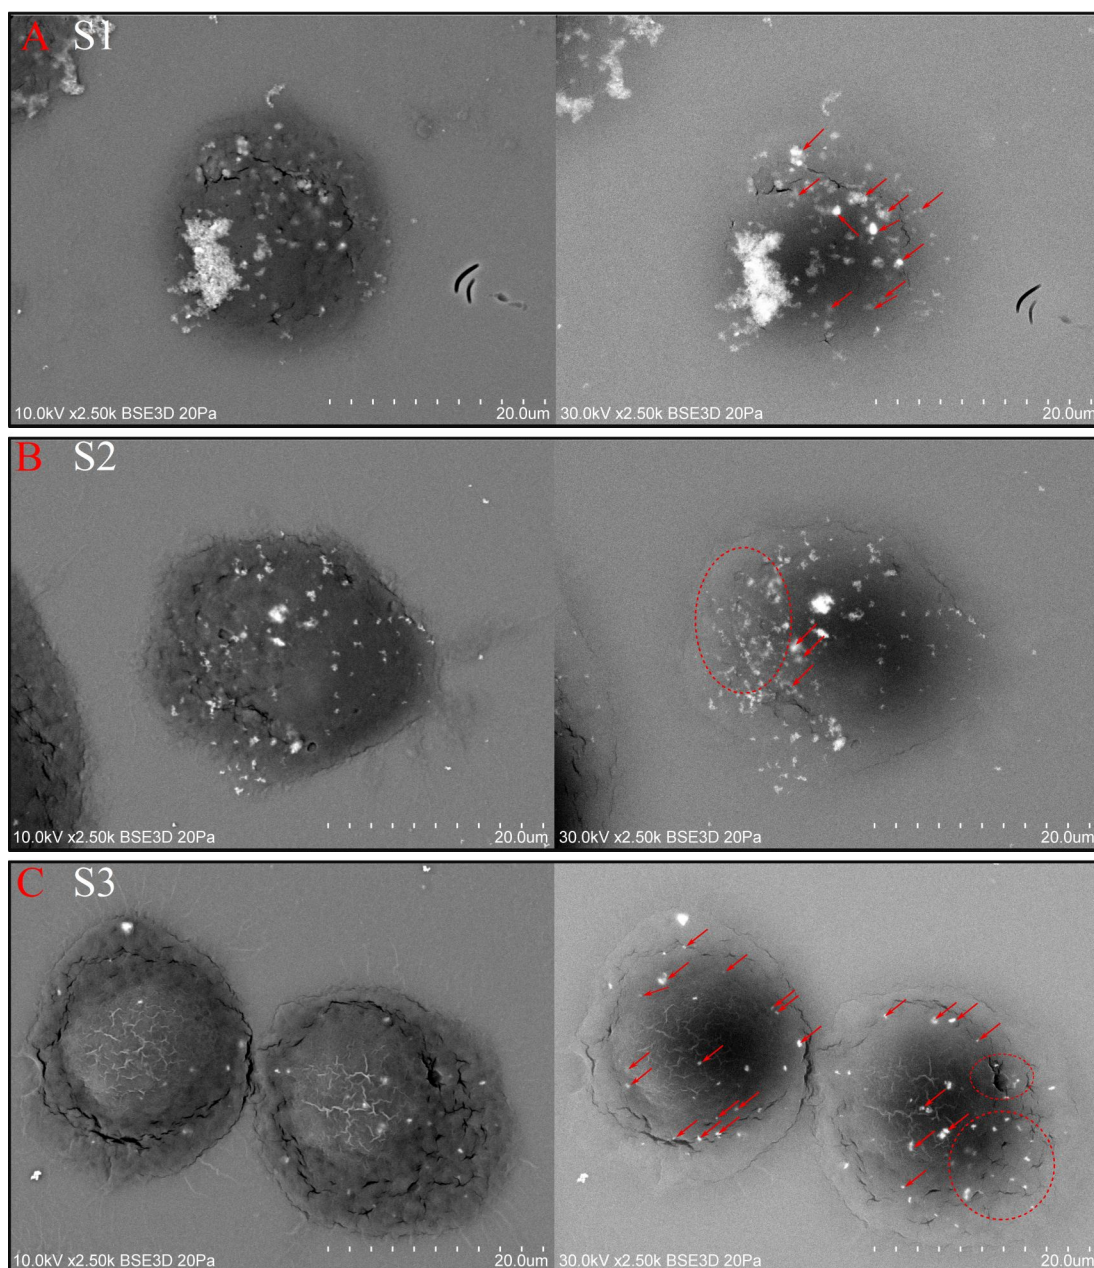

Figure S2. SEM images of interactions of 5 µg/ml NaGdF4 based NPs with J774A.1 after 1h treatment. (A) S1, (B) S2, (C) S3 NPs. The left side represents energy 10.0 kV and right side 30.0 kV (deeper penetration of the cell).

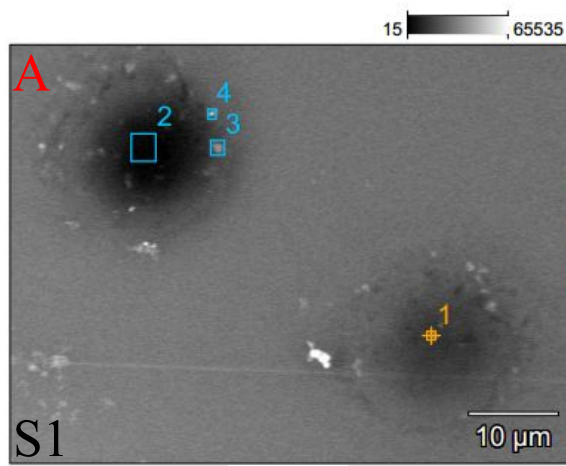

S1

| Weight % |       |       |      |      |      |       |      |      |      |      |      |
|----------|-------|-------|------|------|------|-------|------|------|------|------|------|
|          | C-K   | O-K   | Na-K | Mg-K | Al-K | Si-K  | P-K  | S-K  | K-K  | Ca-K | Gd-L |
| pt1      | 31.85 | 24.38 | 6.27 | 1.90 | 0.57 | 28.38 | 1.05 | 0.22 | 0.69 | 4.01 | 0.69 |
| pt2      | 46.55 | 19.01 | 5.26 | 1.51 | 0.41 | 22.51 | 0.68 | 0.26 | 0.52 | 3.30 |      |
| pt3      | 20.65 | 35.12 | 8.42 | 2.19 | 0.58 | 28.17 | 0.38 | 0.08 | 0.62 | 3.61 | 0.17 |
| pt4      | 18.18 | 36.74 | 8.44 | 2.34 | 0.58 | 28.56 | 0.41 | 0.08 | 0.66 | 3.58 | 0.41 |

  

| Atom % |       |       |      |      |      |       |      |      |      |      |      |
|--------|-------|-------|------|------|------|-------|------|------|------|------|------|
|        | C-K   | O-K   | Na-K | Mg-K | Al-K | Si-K  | P-K  | S-K  | K-K  | Ca-K | Gd-L |
| pt1    | 46.36 | 26.63 | 4.76 | 1.37 | 0.37 | 17.66 | 0.59 | 0.12 | 0.31 | 1.75 | 0.08 |
| pt2    | 61.55 | 18.87 | 3.64 | 0.98 | 0.24 | 12.73 | 0.35 | 0.13 | 0.21 | 1.31 |      |
| pt3    | 31.16 | 39.79 | 6.64 | 1.64 | 0.39 | 18.18 | 0.22 | 0.05 | 0.29 | 1.63 | 0.02 |
| pt4    | 27.84 | 42.24 | 6.75 | 1.77 | 0.39 | 18.71 | 0.25 | 0.05 | 0.31 | 1.64 | 0.05 |

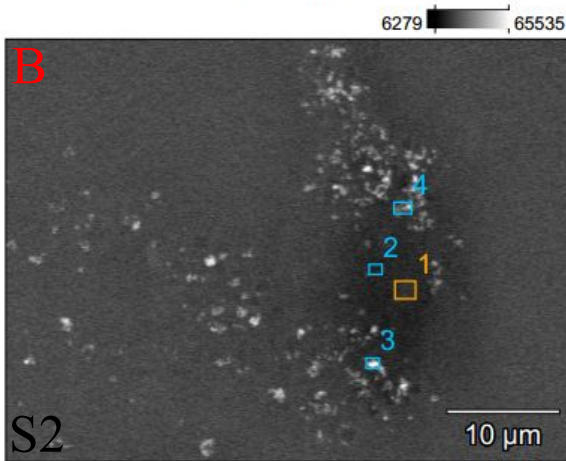

S2

| Weight % |       |      |       |      |      |      |      |       |      |      |      |      |      |           |
|----------|-------|------|-------|------|------|------|------|-------|------|------|------|------|------|-----------|
|          | C-K   | N-K  | O-K   | F-K  | Na-K | Mg-K | Al-K | Si-K  | P-K  | S-K  | K-K  | Ca-K | Co-K | Gd-L      |
| pt1      | 23.64 | 0.00 | 30.83 |      | 7.66 | 2.22 | 0.63 | 29.62 | 0.36 | 0.10 | 0.74 | 4.19 |      |           |
| pt2      | 24.76 | 0.00 | 29.63 |      | 6.94 | 2.19 | 0.61 | 30.03 | 0.34 | 0.19 | 0.78 | 4.45 | 0.09 |           |
| pt3      | 22.01 | 0.00 | 27.09 | 3.41 | 7.35 | 2.21 | 0.59 | 30.57 | 0.23 | 0.12 | 0.70 | 4.26 |      | 1.14 0.32 |
| pt4      | 14.65 |      | 35.33 | 2.50 | 7.88 | 2.50 | 0.58 | 30.83 |      | 0.12 | 0.68 | 4.24 |      | 0.54 0.15 |

  

| Atom % |       |      |       |      |      |      |      |       |      |      |      |      |      |           |
|--------|-------|------|-------|------|------|------|------|-------|------|------|------|------|------|-----------|
|        | C-K   | N-K  | O-K   | F-K  | Na-K | Mg-K | Al-K | Si-K  | P-K  | S-K  | K-K  | Ca-K | Co-K | Gd-L      |
| pt1    | 35.55 | 0.00 | 34.81 |      | 6.02 | 1.65 | 0.42 | 19.05 | 0.21 | 0.06 | 0.34 | 1.89 |      |           |
| pt2    | 37.17 | 0.00 | 33.39 |      | 5.44 | 1.63 | 0.41 | 19.28 | 0.20 | 0.11 | 0.36 | 2.00 |      |           |
| pt3    | 34.12 | 0.00 | 31.53 | 3.34 | 5.96 | 1.69 | 0.41 | 20.27 | 0.14 | 0.07 | 0.33 | 1.98 |      | 0.13 0.03 |
| pt4    | 23.20 |      | 42.02 | 2.51 | 6.52 | 1.96 | 0.41 | 20.89 |      | 0.07 | 0.33 | 2.01 |      | 0.07 0.02 |

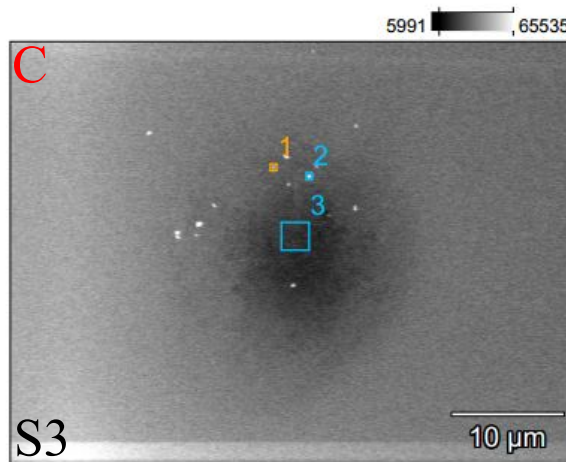

S3

| Weight % |       |       |      |      |      |      |       |      |      |      |      |      |      |
|----------|-------|-------|------|------|------|------|-------|------|------|------|------|------|------|
|          | C-K   | O-K   | F-K  | Na-K | Mg-K | Al-K | Si-K  | P-K  | S-K  | K-K  | Ca-K | Co-K | Gd-L |
| pt1      | 7.89  | 43.46 | 1.03 | 8.83 | 2.51 | 0.72 | 30.56 |      | 0.15 | 0.65 | 3.74 | 0.18 | 0.28 |
| pt2      | 7.60  | 43.78 | 1.21 | 8.63 | 2.54 | 0.68 | 30.50 |      | 0.16 | 0.67 | 3.62 | 0.11 | 0.49 |
| pt3      | 28.35 | 29.10 |      | 8.08 | 2.10 | 0.59 | 27.04 | 0.37 | 0.19 | 0.62 | 3.45 | 0.12 |      |

  

| Atom % |       |       |      |      |      |      |       |      |      |      |      |      |      |
|--------|-------|-------|------|------|------|------|-------|------|------|------|------|------|------|
|        | C-K   | O-K   | F-K  | Na-K | Mg-K | Al-K | Si-K  | P-K  | S-K  | K-K  | Ca-K | Co-K | Gd-L |
| pt1    | 12.76 | 52.75 | 1.05 | 7.46 | 2.01 | 0.52 | 21.13 |      | 0.09 | 0.32 | 1.81 | 0.06 | 0.04 |
| pt2    | 12.31 | 53.22 | 1.24 | 7.30 | 2.03 | 0.49 | 21.12 |      | 0.09 | 0.33 | 1.76 | 0.04 | 0.06 |
| pt3    | 41.25 | 31.78 |      | 6.14 | 1.51 | 0.38 | 16.82 | 0.21 | 0.10 | 0.28 | 1.50 | 0.04 |      |

Figure S3. SEM images and energy dispersive X-ray (EDX) analysis of NaGdF<sub>4</sub> based NPs (5 μg/ml) in J774A.1 cells after 1h incubation. A) S1 B) S2 C) S3.

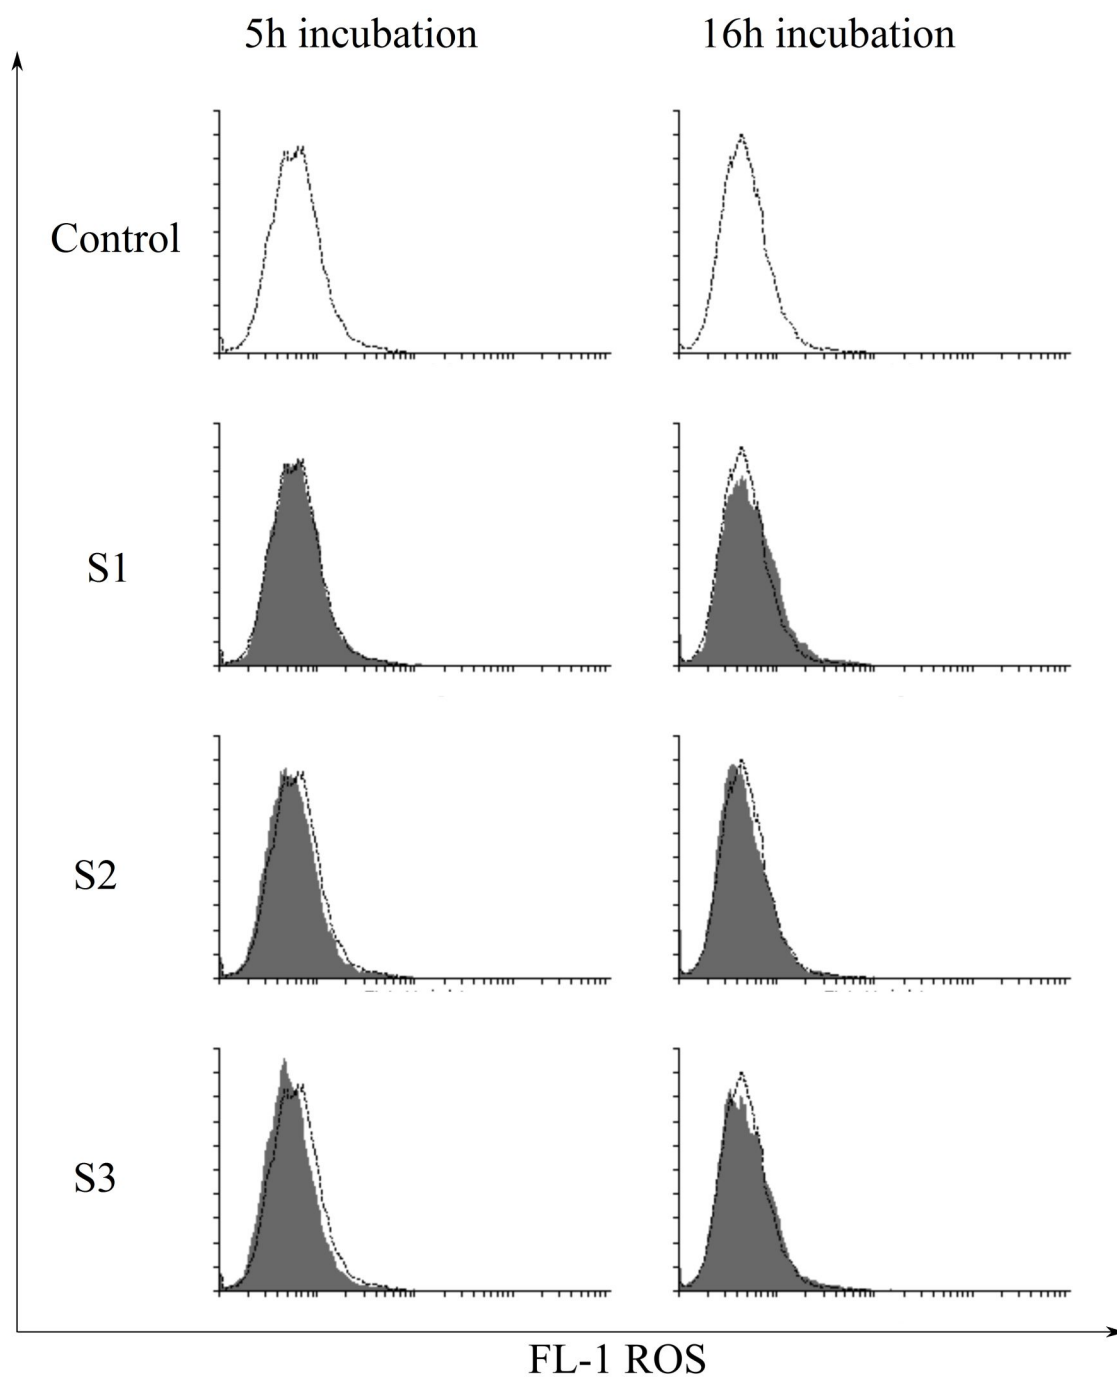

Figure S4. Reactive oxygen species (ROS) induction after 5 or 16h incubation with NaGdF<sub>4</sub> based NPs. Detection of ROS was performed using H<sub>2</sub>DCFDA dye. Shift into the right indicates rise of ROS in the cells.



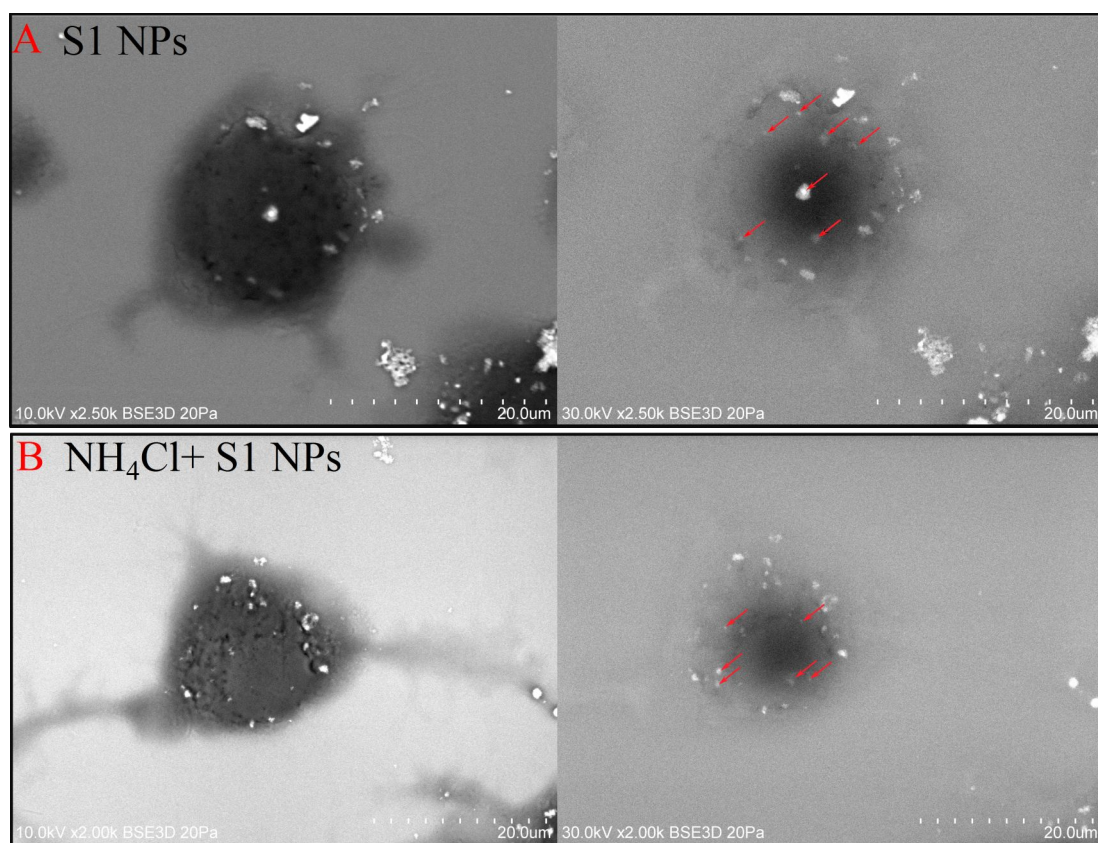

Figure S5. SEM images of interaction of 5  $\mu\text{g/ml}$  NaGdF<sub>4</sub> based NPs with J774A.1. A) Interaction after 1h incubation with S1 NPs, B) Interaction after 2 h preincubation with 5  $\mu\text{M}$  NH<sub>4</sub>Cl and then 1h with S1 NPs.

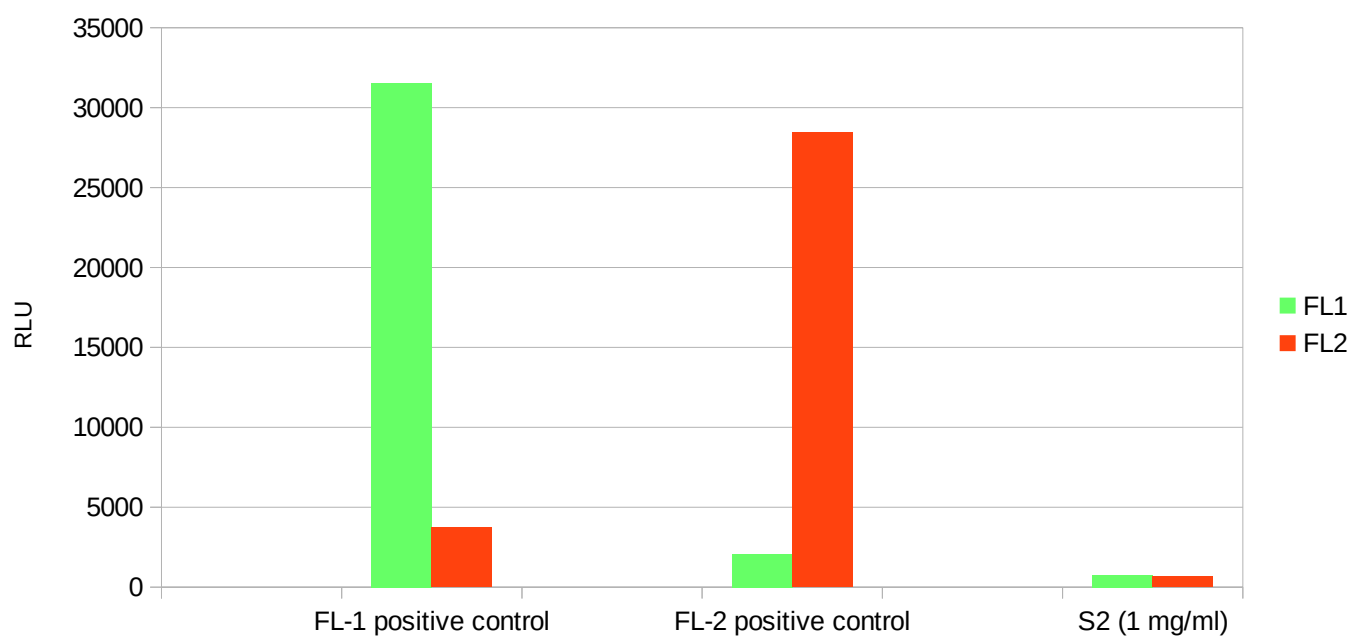

Figure S6. Lack of detectable fluorescence NaGdF4 dotted with Yb and Er (S2) in conditions used in the study.
